# Supplementary material for: Regulatory network changes between cell lines and their tissues of origin
Source: PubMed Central journal article supplement (PMC5596945; doi:10.1186/s12864-017-4111-x), 2017-09-12

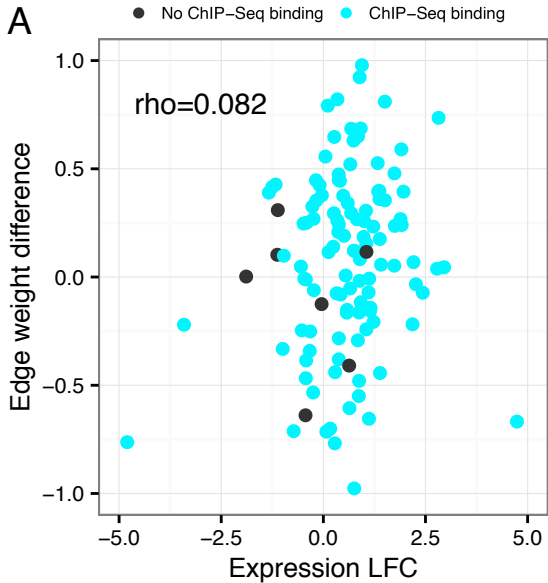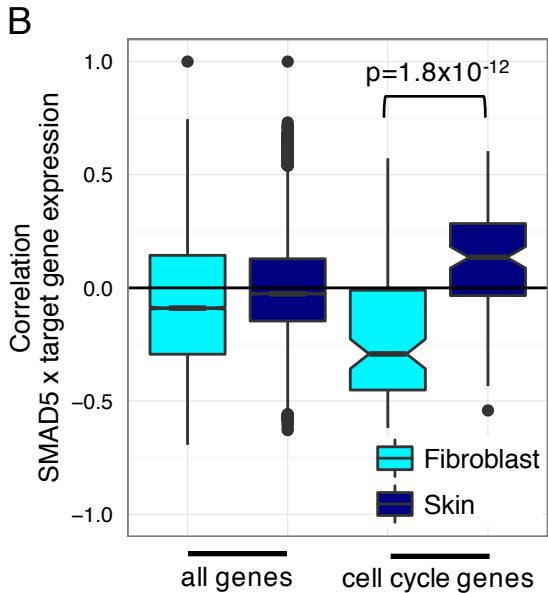

Supplement: 12864_2017_4111_MOESM13_ESM.pdf [file 12864_2017_4111_MOESM13_ESM.pdf]
